# Supplementary material for: High-Frequency Heart Rate Variability Linked to Affiliation with a New Group
Source: PLoS One. 2015 Jun 24;10(6):e0129583. doi: 10.1371/journal.pone.0129583 (PMC4479881; doi:10.1371/journal.pone.0129583)
Supplement: S1 Dataset — (XLS) [file pone.0129583.s001.xls]

## Sheet: Sahdra.csv
ID	TimeOfDay	PrimingCondition	t1_resp	t2_resp	t1_hfpowfft	t2_hfpowfft	Age	Gender	HeightInCM	WeightInKG	t1_mood	t2_mood	MatrixRawDataBlue1a	MatrixRawDataRed1a	MatrixRawDataBlue1b	MatrixRawDataRed1b	MatrixRawDataBlue2a	MatrixRawDataRed2a	MatrixRawDataBlue2b	MatrixRawDataRed2b	MatrixRawDataBlue3a	MatrixRawDataRed3a	MatrixRawDataBlue3b	MatrixRawDataRed3b	LikeRed	LikeBlue	IdentRed	IdentBlue	RedGood	BlueGood	AttachRed	AttachBlue	Ethnicity	Occupation	Education	Income	CaffeineCups	Smoking	Alcohol
701	1105	CareRec	0.16	0.18	126.488	184.588	21	Female	148	60	Neutral	Neutral	19	19	21	18	19	15	25	18	26	16	16	16	Agree	Strongly Agree	Neither Agree nor Disagree	Strongly Agree	Somewhat Agree	Agree	Neither Agree nor Disagree	Strongly Agree	NorthAfricanMidEastern	No work or wrong answer	Undergrad uni degree (eg, BA, BPsych, BSci)	$100,001 - $130,000	1	Never smoked
702	1255	NilRec	0.153945	0.15	129.89	51.6259	42	Female	165.5	58	Very good mood	Very good mood	13	13	13	13	13	13	13	13	16	16	16	16	Agree	Agree	Neither Agree nor Disagree	Somewhat Agree	Somewhat Agree	Somewhat Agree	Neither Agree nor Disagree	Somewhat Agree	NorthWestEuro	Student	Certificate I-IV (eg, TAFE or equivalent)	$50,001 - $60,000	2	Never smoked	1 to 5 standard drinks per week
703	1415	CareRec	0.225223	0.2	1276.4	739.638	22	Female	153.5	74.5	Neutral	Neutral	13	13	13	13	13	13	13	13	16	16	16	16	Neither Agree nor Disagree	Neither Agree nor Disagree	Neither Agree nor Disagree	Somewhat Agree	Neither Agree nor Disagree	Neither Agree nor Disagree	Neither Agree nor Disagree	Somewhat Agree	NorthAfricanMidEastern	Student	Adv. diploma or Assoc degree	$80,001 - $90,000		Current smoker (Please specify how many cigarettes you smoke a day)	1 to 5 standard drinks per week
704	1620	NilRec	0.385441	0.42	523.614	173.856	23	Female	172	75	Very good mood	Very good mood	14	11	19	10	7	1	7	10	22	10	10	22	Neither Agree nor Disagree	Somewhat Agree	Disagree	Agree	Neither Agree nor Disagree	Neither Agree nor Disagree	Disagree	Somewhat Agree	Euro&Asian	Student	Adv. diploma or Assoc degree	$30,001 $40,000	1	Current smoker (Please specify how many cigarettes you smoke a day)
708	1520	NilRec	0.33	0.31	184.011	147.626	21	Male	175	63	Neutral	Neutral	13	13	13	13	13	13	13	13	16	16	16	16	Neither Agree nor Disagree	Neither Agree nor Disagree	Neither Agree nor Disagree	Somewhat Agree	Neither Agree nor Disagree	Neither Agree nor Disagree	Neither Agree nor Disagree	Neither Agree nor Disagree	AsianMixed	Student	High school	$10,000 or less	0	Never smoked	0 standard drinks per week
709	1745	CareRec	0.253733	0.24	847.883	933.732	22	Male	188.5	109.5	Neutral	Neutral	13	13	13	13	13	13	13	13	16	16	16	16	Agree	Agree	Agree	Agree	Agree	Agree	Agree	Agree	SouthEastEuro	Student	Undergrad uni degree (eg, BA, BPsych, BSci)	$90,001 - $100,000	1	Never smoked	1 to 5 standard drinks per week
710	900	CareRec	0.170057	0.15	25.6064	52.0314	23	Female	165	68	Somewhat good mood	Somewhat good mood	13	13	13	13	13	13	13	13	16	16	16	16	Agree	Agree	Somewhat Agree	Agree	Agree	Agree	Neither Agree nor Disagree	Neither Agree nor Disagree	NorthWestEuro	Student	Certificate I-IV (eg, TAFE or equivalent)	$80,001 - $90,000	0	Never smoked	0 standard drinks per week
711	1025	NilRec	0.281311	0.31	807.98	1415.38	18	Male	177.5	76	Very good mood	Very good mood	13	13	13	13	13	13	13	13	16	16	16	16	Agree	Agree	Neither Agree nor Disagree	Strongly Agree	Neither Agree nor Disagree	Neither Agree nor Disagree	Neither Agree nor Disagree	Somewhat Agree	SouthEastAsian	Student	Undergrad uni degree (eg, BA, BPsych, BSci)	$10,001 - $20,000	1	Never smoked	0 standard drinks per week
712	1235	FacialRec	0.282869	0.26	380.811	341.883	19	Female	161	69	Neutral	Somewhat good mood	19	1	25	7	7	1	5	9	28	4	13	19	Disagree	Agree	Neither Agree nor Disagree	Somewhat Agree	Neither Agree nor Disagree	Somewhat Agree	Somewhat Disagree	Agree	NorthAfricanMidEastern	Student	Undergrad uni degree (eg, BA, BPsych, BSci)	$40,001 - $50,000	1	Never smoked	1 to 5 standard drinks per week
715	1705	CareRec	0.228113	0.27	192.875	11.1242	24	Male	184.5	76.5	Somewhat good mood	Somewhat good mood	13	13	13	13	13	13	13	13	16	16	16	16	Neither Agree nor Disagree	Neither Agree nor Disagree	Disagree	Agree	Neither Agree nor Disagree	Neither Agree nor Disagree	Neither Agree nor Disagree	Neither Agree nor Disagree	SouthAsian	Carers	Certificate I-IV (eg, TAFE or equivalent)	$50,001 - $60,000	2	Never smoked	0 standard drinks per week
716	1820	NilRec	0.25027	0.24	3538.14	1827.73	38	Female	171.5	75	Somewhat good mood	Somewhat good mood	15	9	13	13	11	9	17	15	17	15	16	16	Neither Agree nor Disagree	Agree	Neither Agree nor Disagree	Agree	Agree	Agree	Disagree	Agree	NorthWestEuro	Clerical	Certificate I-IV (eg, TAFE or equivalent)	$80,001 - $90,000	1	Current smoker (Please specify how many cigarettes you smoke a day)	1 to 5 standard drinks per week
717	1950	FacialRec	0.221358	0.29	481.943	375.178	23	Female	155	46.5	Somewhat good mood	Neutral	13	13	15	12	11	9	23	18	17	15	16	16	Neither Agree nor Disagree	Agree	Disagree	Somewhat Agree	Somewhat Agree	Somewhat Agree	Somewhat Disagree	Neither Agree nor Disagree	SouthAsian	Student	Undergrad uni degree (eg, BA, BPsych, BSci)	$50,001 - $60,000	2	Never smoked	1 to 5 standard drinks per week
718	2105	CareRec	0.314038	0.32	832.425	801.912	23	Female	161	50.5	Neutral	Neutral	13	13	19	10	18	23	25	19	18	14	16	16	Somewhat Disagree	Agree	Somewhat Disagree	Agree	Agree	Agree	Disagree	Agree	SouthAsian	Student	Undergrad uni degree (eg, BA, BPsych, BSci)	$40,001 - $50,000	1	Never smoked	More than 10 standard drinks per week
719	1050	CareRec	0.323654	0.26	37.8757	80.8817	21	Female	162	60	Somewhat good mood	Neutral	13	13	13	13	13	13	13	13	16	16	16	16	Somewhat Agree	Somewhat Agree	Disagree	Somewhat Disagree	Neither Agree nor Disagree	Neither Agree nor Disagree	Disagree	Disagree	EuroMixed	Student	High school	$10,001 - $20,000	0	Never smoked	1 to 5 standard drinks per week
720	1435	FacialRec	0.187357	0.27	295.222	294.092	19	Male	174.5	113.5	Somewhat good mood	Somewhat good mood	13	13	13	13	13	13	13	13	16	16	16	16	Neither Agree nor Disagree	Agree	Neither Agree nor Disagree	Somewhat Agree	Agree	Agree	Neither Agree nor Disagree	Neither Agree nor Disagree	NorthWestEuro	Student	Certificate I-IV (eg, TAFE or equivalent)	$80,001 - $90,000	1	Current smoker (Please specify how many cigarettes you smoke a day)	1 to 5 standard drinks per week
721	1550	NilRec	0.290367	0.27	356.998	217.594	33	Male	160	57.5	Somewhat good mood	Very good mood	15	15	25	15	15	15	11	10	20	15	15	20	Neither Agree nor Disagree	Neither Agree nor Disagree	Neither Agree nor Disagree	Neither Agree nor Disagree	Neither Agree nor Disagree	Neither Agree nor Disagree	Neither Agree nor Disagree	Neither Agree nor Disagree	SouthAsian	Student	Undergrad uni degree (eg, BA, BPsych, BSci)	$10,000 or less	0	Ex-smoker (Please specify how many cigarettes you smoked a day)	0 standard drinks per week
723	810	NilRec	0.315657	0.3	1248.48	314.37	27	Female	167.5	73.5	Extremely good mood	Extremely good mood	13	13	13	13	16	19	19	16	16	16	16	16	Strongly Agree	Strongly Agree	Strongly Agree	Strongly Agree	Agree	Agree	Agree	Agree	NorthWestEuro	Machinery operators	Postgrad uni degree (eg, PhD, Masters)	$100,001 - $130,000	1	Never smoked	1 to 5 standard drinks per week
725	1330	CareRec	0.28	0.27	85.6666	127.534	40	Female	171.5	122.5	Somewhat good mood	Somewhat good mood	13	13	13	13	13	13	13	13	16	16	16	16	Neither Agree nor Disagree	Neither Agree nor Disagree	Neither Agree nor Disagree	Somewhat Agree	Neither Agree nor Disagree	Neither Agree nor Disagree	Disagree	Neither Agree nor Disagree	SouthEastEuro	Professional, bus, health, educ	Postgrad uni degree (eg, PhD, Masters)	$70,001 - $80,000	2	Never smoked	0 standard drinks per week
726	1455	FacialRec	0.18488	0.21	164.769	150.387	19	Male	174	80	Very good mood	Somewhat good mood	13	13	13	13	13	13	13	13	16	16	16	16	Neither Agree nor Disagree	Neither Agree nor Disagree	Neither Agree nor Disagree	Neither Agree nor Disagree	Somewhat Agree	Somewhat Agree	Neither Agree nor Disagree	Neither Agree nor Disagree	Euro&Asian	Student	High school	$70,001 - $80,000	0	Never smoked	0 standard drinks per week
727	1630	NilRec	0.24109	0.23	2169.76	1067.78	20	Female	150	60.5	Neutral	Neutral	19	1	25	7	11	9	25	19	28	4	16	16	Disagree	Strongly Agree	Strongly Disagree	Strongly Agree	Disagree	Strongly Agree	Strongly Disagree	Strongly Agree	NorthAfricanMidEastern	Student	Certificate I-IV (eg, TAFE or equivalent)	$10,000 or less	2	Never smoked	0 standard drinks per week
728	1020	FacialRec	0.252111	0.29	258.024	506.664	18	Female	152	73.5	Somewhat good mood	Neutral	13	13	25	7	13	13	25	19	16	16	16	16	Neither Agree nor Disagree	Agree	Disagree	Agree	Somewhat Agree	Agree	Neither Agree nor Disagree	Somewhat Agree	NorthAfricanMidEastern	Student	High school	$30,001 $40,000	0	Never smoked	0 standard drinks per week
730	1440	CareRec	0.302293	0.31	1916.2	2461.83	20	Male	177	100	Somewhat good mood	Neutral	19	1	25	7	7	1	25	19	28	4	16	16	Somewhat Agree	Somewhat Agree	Somewhat Agree	Agree	Strongly Disagree	Somewhat Agree	Strongly Agree	Strongly Disagree	Euro&MidEastern	Student	Undergrad uni degree (eg, BA, BPsych, BSci)	More than $130,000	0	Never smoked	0 standard drinks per week
731	1615	CareRec	0.352841	0.33	262.309	230.735	20	Male	171	85	Neutral	Somewhat bad mood	18	3	21	9	13	13	15	14	18	14	13	19	Neither Agree nor Disagree	Somewhat Agree	Neither Agree nor Disagree	Somewhat Agree	Neither Agree nor Disagree	Somewhat Agree	Neither Agree nor Disagree	Agree	NorthAfricanMidEastern	Student	Adv. diploma or Assoc degree	$100,001 - $130,000	1	Current smoker (Please specify how many cigarettes you smoke a day)	0 standard drinks per week
732	1735	NilRec	0.15	0.26	233.476	408.226	25	Female	163	64	Very good mood	Very good mood	13	13	13	13	13	13	13	13	16	16	16	16	Neither Agree nor Disagree	Neither Agree nor Disagree	Somewhat Disagree	Somewhat Agree	Neither Agree nor Disagree	Neither Agree nor Disagree	Disagree	Neither Agree nor Disagree	NorthAfricanMidEastern	Student	Undergrad uni degree (eg, BA, BPsych, BSci)	$10,000 or less	2	Current smoker (Please specify how many cigarettes you smoke a day)	1 to 5 standard drinks per week
735	1010	FacialRec	0.29579	0.29	282.286	521.118	25	Female	160	48.5	Somewhat good mood	Somewhat good mood	7	1	7	7	7	1	7	7	16	4	4	16	Somewhat Agree	Somewhat Agree	Neither Agree nor Disagree	Somewhat Agree	Neither Agree nor Disagree	Somewhat Agree	Somewhat Disagree	Disagree	NorthEastAsian	Student	Undergrad uni degree (eg, BA, BPsych, BSci)	$10,000 or less	0	Never smoked	1 to 5 standard drinks per week
736	1130	NilRec	0.28	0.28	299.785	134.36	34	Female	161	88	Neutral	Neutral	13	13	13	13	11	9	9	11	16	16	16	16	Neither Agree nor Disagree	Neither Agree nor Disagree	Neither Agree nor Disagree	Neither Agree nor Disagree	Neither Agree nor Disagree	Neither Agree nor Disagree	Neither Agree nor Disagree	Neither Agree nor Disagree	NorthWestEuro	Student	Certificate I-IV (eg, TAFE or equivalent)	$70,001 - $80,000	1	Ex-smoker (Please specify how many cigarettes you smoked a day)	0 standard drinks per week
737	1310	CareRec	0.346739	0.36	1109.81	1293.09	19	Female	160	65.5	Very good mood	Very good mood	13	13	13	13	13	13	13	13	16	16	16	16	Agree	Strongly Agree	Neither Agree nor Disagree	Agree	Neither Agree nor Disagree	Neither Agree nor Disagree	Somewhat Disagree	Agree	NorthWestEuro	Student	High school	$10,001 - $20,000		Never smoked	0 standard drinks per week
738	1640	NilRec	0.34634	0.37	735.588	335.633	20	Female	155	49	Somewhat good mood	Very good mood	14	11	17	11	16	19	15	14	20	12	9	23	Neither Agree nor Disagree	Agree	Disagree	Agree	Neither Agree nor Disagree	Somewhat Agree	Disagree	Somewhat Agree	SouthEastAsian	Student	Undergrad uni degree (eg, BA, BPsych, BSci)	$80,001 - $90,000	1	Never smoked	0 standard drinks per week
739	1825	FacialRec	0.339912	0.36	1051.54	278.936	19	Female	161.6	59.5	Extremely good mood	Very good mood	13	13	13	13	13	13	13	13	16	16	16	16	Neither Agree nor Disagree	Somewhat Agree	Disagree	Agree	Neither Agree nor Disagree	Somewhat Agree	Disagree	Neither Agree nor Disagree	NorthAfricanMidEastern	Student	High school	$10,001 - $20,000	0	Never smoked	0 standard drinks per week
740	845	CareRec	0.252233	0.24	1295.7	1562.48	19	Female	167	82	Very good mood	Neutral	13	13	17	11	13	13	15	14	19	13	16	16	Neither Agree nor Disagree	Somewhat Agree	Strongly Disagree	Strongly Agree	Neither Agree nor Disagree	Agree	Disagree	Agree	NorthAfricanMidEastern	Student	High school	$30,001 $40,000	0	Never smoked	0 standard drinks per week
744	1450	CareRec	0.332417	0.33	126.912	123.589	27	Male	159	58.5	Somewhat good mood	Somewhat good mood	11	17	17	11	9	5	9	11	17	16	12	20	Neither Agree nor Disagree	Somewhat Agree	Agree	Strongly Agree	Somewhat Agree	Agree	Somewhat Disagree	Somewhat Agree	SouthEastAsian	Student	Undergrad uni degree (eg, BA, BPsych, BSci)	$10,000 or less	0	Never smoked	5 to 10 standard drinks per week
745	1620	NilRec	0.240429	0.24	151.469	336.084	23	Female	158	56	Somewhat good mood	Somewhat good mood	13	13	13	13	13	13	13	13	16	16	16	16	Neither Agree nor Disagree	Neither Agree nor Disagree	Somewhat Disagree	Somewhat Agree	Neither Agree nor Disagree	Neither Agree nor Disagree	Somewhat Disagree	Somewhat Agree	NorthEastAsian	Student	High school	$20,001 - $30,000	1	Never smoked	0 standard drinks per week
746	1925	FacialRec	0.175521	0.23	1233.98	496.362	20	Female	177	73	Somewhat good mood	Somewhat good mood	13	13	13	13	13	13	13	13	16	16	16	16	Neither Agree nor Disagree	Neither Agree nor Disagree	Disagree	Somewhat Agree	Neither Agree nor Disagree	Somewhat Agree	Somewhat Disagree	Neither Agree nor Disagree	NorthWestEuro	Student	Undergrad uni degree (eg, BA, BPsych, BSci)	$10,001 - $20,000		Never smoked	0 standard drinks per week
747	815	FacialRec	0.262892	0.25	719.537	493.515	23	Female	157.5	59.5	Somewhat good mood	Neutral	13	13	13	13	13	13	13	13	16	16	16	16	Neither Agree nor Disagree	Neither Agree nor Disagree	Neither Agree nor Disagree	Neither Agree nor Disagree	Neither Agree nor Disagree	Neither Agree nor Disagree	Neither Agree nor Disagree	Neither Agree nor Disagree	NorthWestEuro	Professional, bus, health, educ	Certificate I-IV (eg, TAFE or equivalent)	$60,001 - $70,000	0	Never smoked	1 to 5 standard drinks per week
748	935	CareRec	0.198454	0.2	1509.79	705.256	29	Female	171	63	Very good mood	Very good mood	13	13	13	13	13	13	13	13	16	16	16	16	Somewhat Agree	Somewhat Agree	Neither Agree nor Disagree	Somewhat Agree	Somewhat Agree	Somewhat Agree	Neither Agree nor Disagree	Somewhat Agree	NorthWestEuro	Student	Certificate I-IV (eg, TAFE or equivalent)	$90,001 - $100,000	0	Never smoked	1 to 5 standard drinks per week
749	1115	NilRec	0.305055	0.32	1302.05	1416.38	21	Female	159	55	Somewhat good mood	Somewhat good mood	14	11	11	14	13	13	13	13	16	16	10	22	Agree	Agree	Neither Agree nor Disagree	Somewhat Agree	Somewhat Agree	Somewhat Agree	Neither Agree nor Disagree	Neither Agree nor Disagree	SouthAsian	Student	High school	$50,001 - $60,000	0	Never smoked	5 to 10 standard drinks per week
750	1345	NilRec	0.342061	0.33	154.291	103.673	19	Male	182	95	Somewhat good mood	Somewhat good mood	13	13	13	13	13	13	13	13	16	16	16	16	Neither Agree nor Disagree	Neither Agree nor Disagree	Disagree	Agree	Neither Agree nor Disagree	Neither Agree nor Disagree	Disagree	Agree	NorthAfricanMidEastern	Student	High school	$80,001 - $90,000	0	Never smoked	0 standard drinks per week
751	1420	FacialRec	0.255647	0.26	473.252	181.414	24	Male	187	97.5	Somewhat good mood	Somewhat good mood	14	11	15	12	12	11	17	15	17	15	16	16	Neither Agree nor Disagree	Agree	Neither Agree nor Disagree	Agree	Neither Agree nor Disagree	Neither Agree nor Disagree	Strongly Disagree	Agree	NorthWestEuro	Student	Undergrad uni degree (eg, BA, BPsych, BSci)	More than $130,000	0	Never smoked	1 to 5 standard drinks per week
752	1545	CareRec	0.291942	0.17	28.0412	82.1338	43	Male	184	118	Somewhat good mood	Somewhat bad mood	17	5	21	9	8	3	2	8	28	4	6	26	Neither Agree nor Disagree	Neither Agree nor Disagree	Neither Agree nor Disagree	Neither Agree nor Disagree	Neither Agree nor Disagree	Neither Agree nor Disagree	Neither Agree nor Disagree	Neither Agree nor Disagree	NorthWestEuro	Student	Certificate I-IV (eg, TAFE or equivalent)	$50,001 - $60,000	0	Ex-smoker (Please specify how many cigarettes you smoked a day)	5 to 10 standard drinks per week
753	1340	NilRec	0.212081	0.27	523.907	567.885	20	Female	176	149	Somewhat good mood	Somewhat good mood	14	11	23	8	11	9	25	19	20	12	16	16	Neither Agree nor Disagree	Somewhat Agree	Strongly Disagree	Strongly Agree	Neither Agree nor Disagree	Neither Agree nor Disagree	Disagree	Agree	Oceania	Student	High school	$10,000 or less	3	Never smoked	0 standard drinks per week
755	1320	FacialRec	0.309621	0.3	724.188	613.761	21	Female	160	50.5	Neutral	Neutral	13	13	13	13	13	13	13	13	16	16	16	16	Neither Agree nor Disagree	Neither Agree nor Disagree	Disagree	Agree	Neither Agree nor Disagree	Neither Agree nor Disagree	Neither Agree nor Disagree	Neither Agree nor Disagree	NorthAfricanMidEastern	Student	Graduate diploma or certificate	$10,001 - $20,000	0	Never smoked	0 standard drinks per week
756	1515	NilRec	0.328222	0.35	225.218	222.17	21	Female	166	58	Somewhat good mood	Very good mood	13	13	15	12	16	19	19	16	16	16	16	16	Neither Agree nor Disagree	Neither Agree nor Disagree	Neither Agree nor Disagree	Somewhat Agree	Somewhat Agree	Agree	Somewhat Agree	Agree	NorthAfricanMidEastern	Student	Adv. diploma or Assoc degree	$70,001 - $80,000	1	Never smoked	0 standard drinks per week
757	1050	CareRec	0.226705	0.23	434.216	401.559	21	Female	160	82.5	Very good mood	Very good mood	13	13	13	13	13	13	13	13	16	16	16	16	Neither Agree nor Disagree	Neither Agree nor Disagree	Disagree	Disagree	Neither Agree nor Disagree	Neither Agree nor Disagree	Disagree	Disagree	AmericanNonEuro	Student	Certificate I-IV (eg, TAFE or equivalent)	$10,001 - $20,000	0	Never smoked	0 standard drinks per week
758	1155	FacialRec	0.232887	0.21	217.407	93.5345	47	Female	160.5	100	Extremely good mood	Extremely good mood	13	13	13	13	13	13	13	13	16	16	16	16	Neither Agree nor Disagree	Agree	Neither Agree nor Disagree	Somewhat Agree	Somewhat Agree	Agree	Neither Agree nor Disagree	Somewhat Agree	AmericanNonEuro	Student	Adv. diploma or Assoc degree	$20,001 - $30,000		Ex-smoker (Please specify how many cigarettes you smoked a day)	0 standard drinks per week
759	1020	FacialRec	0.232584	0.23	186.804	237.912	19	Female	168.5	74.5	Very good mood	Somewhat good mood	13	13	13	13	13	13	13	13	16	16	16	16	Neither Agree nor Disagree	Somewhat Agree	Strongly Disagree	Somewhat Agree	Neither Agree nor Disagree	Neither Agree nor Disagree	Neither Agree nor Disagree	Somewhat Agree	SouthEastEuro	Student	Undergrad uni degree (eg, BA, BPsych, BSci)	$10,001 - $20,000	1	Never smoked	0 standard drinks per week
760	1140	CareRec	0.329263	0.32	1359.87	1727.04	18	Female	154	57	Somewhat good mood	Somewhat good mood	14	11	13	13	9	5	21	17	20	12	15	17	Agree	Agree	Agree	Agree	Agree	Agree	Agree	Strongly Agree	AsianMixed	Student	High school	$80,001 - $90,000	1	Never smoked	1 to 5 standard drinks per week
762	1155	NilRec	0.237114	0.26	331.756	284.824	27	Female	158.5	60.5	Very good mood	Very good mood	13	13	13	13	13	13	13	13	16	16	16	16	Agree	Agree	Neither Agree nor Disagree	Neither Agree nor Disagree	Agree	Agree	Neither Agree nor Disagree	Neither Agree nor Disagree	NorthWestEuro	Student	Certificate I-IV (eg, TAFE or equivalent)	$60,001 - $70,000	2	Never smoked	1 to 5 standard drinks per week
764	1715	FacialRec	0.302935	0.34	1170.11	895.662	20	Female	154.5	57.5	Somewhat good mood	Somewhat good mood	19	1	25	7	12	11	25	19	28	4	16	16	Neither Agree nor Disagree	Agree	Somewhat Disagree	Somewhat Agree	Neither Agree nor Disagree	Somewhat Agree	Somewhat Disagree	Somewhat Agree	SouthEastEuro	Student	High school	$70,001 - $80,000		Never smoked	0 standard drinks per week
765	1845	FacialRec	0.273877	0.18	1488.63	1375.55	18	Female	156	51.5	Somewhat good mood	Somewhat good mood	19	1	25	7	13	13	25	19	28	4	16	16	Disagree	Agree	Disagree	Agree	Disagree	Agree	Disagree	Agree	SouthEastEuro	Student	High school	More than $130,000	0	Never smoked	0 standard drinks per week
767	1450	CareRec	0.269796	0.26	385.261	138.32	31	Male	183	83	Neutral	Neutral	13	13	13	13	13	13	13	13	16	16	16	16	Neither Agree nor Disagree	Somewhat Agree	Disagree	Agree	Neither Agree nor Disagree	Agree	Disagree	Somewhat Agree	African	Student	Undergrad uni degree (eg, BA, BPsych, BSci)	$100,001 - $130,000	1	Never smoked	5 to 10 standard drinks per week
768	1655	NilRec	0.38071	0.39	176.104	172.453	21	Female	162	49.5	Somewhat good mood	Very bad mood	28	18	5	31	9	7	17	14	17	15	27	10	Disagree	Strongly Agree	Strongly Disagree	Strongly Agree	Disagree	Agree	Somewhat Disagree	Strongly Agree	NorthAfricanMidEastern	Student	Adv. diploma or Assoc degree	$10,000 or less	1	Never smoked	0 standard drinks per week
769	945	NilRec	0.334673	0.33	321.742	308.185	51	Female	170	85	Somewhat good mood	Very good mood	14	11	15	12	12	11	15	14	16	16	16	16	Agree	Strongly Agree	Somewhat Agree	Strongly Agree	Somewhat Agree	Strongly Agree	Somewhat Disagree	Strongly Agree	Oceania	Professional, bus, health, educ	Adv. diploma or Assoc degree	$90,001 - $100,000	1	Never smoked	0 standard drinks per week
770	1120	FacialRec	0.275387	0.29	2579.77	1284.71	18	Female	160	60	Neutral	Very good mood	19	19	17	10	15	15	23	19	17	12	15	17	Agree	Agree	Disagree	Strongly Agree	Agree	Strongly Agree	Somewhat Disagree	Agree	NorthAfricanMidEastern	Student	High school	$10,000 or less	0	Never smoked	0 standard drinks per week
771	1245	CareRec	0.4	0.4	342.96	134.503	18	Female	161	85.5	Somewhat good mood	Somewhat good mood	13	13	13	13	13	13	13	13	16	16	16	16	Neither Agree nor Disagree	Neither Agree nor Disagree	Neither Agree nor Disagree	Neither Agree nor Disagree	Neither Agree nor Disagree	Neither Agree nor Disagree	Disagree	Disagree	SouthAsian	Student	High school	$30,001 $40,000	0	Never smoked	0 standard drinks per week
772	1415	FacialRec	0.393611	0.39	119.219	148.42	19	Female	159	49	Neutral	Neutral	14	11	5	17	8	3	9	11	18	14	15	17	Neither Agree nor Disagree	Somewhat Agree	Somewhat Disagree	Strongly Agree	Neither Agree nor Disagree	Agree	Strongly Disagree	Strongly Agree	SouthEastAsian	Student	High school	$10,001 - $20,000	0	Current smoker (Please specify how many cigarettes you smoke a day)	1 to 5 standard drinks per week
773	845	NilRec	0.233992	0.24	225.829	264.461	19	Female	172.5	70	Neutral	Neutral	19	1	25	7	7	1	25	19	28	4	16	16	Disagree	Strongly Agree	Strongly Disagree	Strongly Agree	Neither Agree nor Disagree	Strongly Agree	Strongly Disagree	Strongly Agree	SouthEastEuro	Student	High school	$40,001 - $50,000	0	Never smoked	0 standard drinks per week
774	1000	CareRec	0.267022	0.25	768.595	782.71	19	Female	168	67.5	Very good mood	Somewhat good mood	11	17	19	10	10	7	13	13	22	10	8	24	Neither Agree nor Disagree	Somewhat Agree	Somewhat Disagree	Neither Agree nor Disagree	Somewhat Agree	Somewhat Agree	Neither Agree nor Disagree	Neither Agree nor Disagree	SouthEastEuro	Student	High school	$80,001 - $90,000	0	Never smoked	0 standard drinks per week
775	1115	CareRec	0.262669	0.25	242.926	117.174	18	Female	166.5	53.5	Somewhat good mood	Neutral	15	17	23	15	17	21	5	19	18	12	5	27	Agree	Agree	Neither Agree nor Disagree	Neither Agree nor Disagree	Agree	Strongly Agree	Somewhat Disagree	Somewhat Disagree	NorthAfricanMidEastern	Student	High school	$60,001 - $70,000	0	Never smoked	0 standard drinks per week
777	1500	FacialRec	0.258264	0.26	1491.91	860.342	21	Male	179	88	Very good mood	Neutral	13	13	9	15	12	11	7	10	16	16	16	16	Strongly Disagree	Agree	Disagree	Agree	Somewhat Disagree	Agree	Strongly Disagree	Agree	NorthAfricanMidEastern	Student	Undergrad uni degree (eg, BA, BPsych, BSci)	$20,001 - $30,000	0	Never smoked	0 standard drinks per week
778	1045	NilRec	0.348995	0.39	78.5058	45.0948	28	Male	177	83	Very good mood	Very good mood	13	13	13	13	13	13	13	13	16	16	16	16	Neither Agree nor Disagree	Neither Agree nor Disagree	Neither Agree nor Disagree	Neither Agree nor Disagree	Neither Agree nor Disagree	Neither Agree nor Disagree	Neither Agree nor Disagree	Neither Agree nor Disagree	NorthWestEuro	Student	High school	$60,001 - $70,000	0	Never smoked	0 standard drinks per week
779	1235	CareRec	0.294742	0.33	105.141	144.432	20	Female	171	71	Very good mood	Very good mood	13	13	13	13	13	13	13	13	16	16	16	16	Neither Agree nor Disagree	Agree	Disagree	Agree	Neither Agree nor Disagree	Neither Agree nor Disagree	Disagree	Agree	NorthAfricanMidEastern	Student	High school	$50,001 - $60,000	1	Current smoker (Please specify how many cigarettes you smoke a day)	0 standard drinks per week
780	1515	FacialRec	0.225576	0.29	1025.81	115.487	20	Female	165	56	Somewhat good mood	Somewhat good mood	19	1	17	11	10	7	19	16	20	12	16	16	Somewhat Disagree	Agree	Disagree	Agree	Neither Agree nor Disagree	Somewhat Agree	Disagree	Agree	NorthWestEuro	Student	High school	$10,001 - $20,000	1	Current smoker (Please specify how many cigarettes you smoke a day)	0 standard drinks per week
781	1655	NilRec	0.311946	0.32	199.239	215.742	20	Female	157	77	Somewhat good mood	Somewhat good mood	13	13	13	13	14	15	13	14	16	16	16	16	Somewhat Agree	Agree	Somewhat Disagree	Agree	Somewhat Agree	Strongly Agree	Disagree	Somewhat Agree	NorthAfricanMidEastern	Student	Adv. diploma or Assoc degree	$10,000 or less	1	Current smoker (Please specify how many cigarettes you smoke a day)	0 standard drinks per week
782	830	CareRec	0.233112	0.24	46.8065	71.4144	20	Female	171	77.5	Very good mood	Very good mood	13	13	13	13	13	13	13	13	16	16	16	16	Agree	Agree	Somewhat Disagree	Somewhat Agree	Agree	Agree	Neither Agree nor Disagree	Neither Agree nor Disagree	Euro&Asian	Student	Certificate I-IV (eg, TAFE or equivalent)	$50,001 - $60,000	0	Never smoked	0 standard drinks per week
783	1135	FacialRec	0.39	0.33	27.3934	121.892	55	Male	171.5	75.5	Somewhat good mood	Neutral	13	13	13	13	13	13	13	13	16	16	16	16	Neither Agree nor Disagree	Neither Agree nor Disagree	Neither Agree nor Disagree	Neither Agree nor Disagree	Neither Agree nor Disagree	Neither Agree nor Disagree	Neither Agree nor Disagree	Neither Agree nor Disagree	NorthEastAsian	Professional, bus, health, educ	Certificate I-IV (eg, TAFE or equivalent)	$50,001 - $60,000	2	Never smoked	0 standard drinks per week
784	1330	FacialRec	0.223901	0.25	77.8012	61.0579	49	Female	158.5	44.5	Neutral	Neutral	10	11	25	19	7	25	25	17	28	5	16	16	Neither Agree nor Disagree	Neither Agree nor Disagree	Neither Agree nor Disagree	Neither Agree nor Disagree	Neither Agree nor Disagree	Neither Agree nor Disagree	Neither Agree nor Disagree	Neither Agree nor Disagree	NorthEastAsian	Professional, bus, health, educ	High school	$20,001 - $30,000	0	Never smoked	0 standard drinks per week
785	1450	CareRec	0.341564	0.33	335.171	365.917	19	Female	169	56.5	Neutral	Somewhat good mood	7	25	19	10	13	13	23	18	27	5	16	16	Somewhat Disagree	Agree	Disagree	Agree	Neither Agree nor Disagree	Agree	Strongly Disagree	Agree	NorthAfricanMidEastern	Student	Certificate I-IV (eg, TAFE or equivalent)	$30,001 $40,000		Never smoked	0 standard drinks per week
786	1610	NilRec	0.155539	0.2	292.202	595.511	20	Male	180.5	81	Somewhat good mood	Somewhat good mood	13	13	13	13	13	13	13	13	16	16	16	16	Neither Agree nor Disagree	Neither Agree nor Disagree	Somewhat Disagree	Somewhat Agree	Neither Agree nor Disagree	Neither Agree nor Disagree	Disagree	Agree	NorthEastAsian	Student	High school	More than $130,000	1	Never smoked	0 standard drinks per week
787	1755	FacialRec	0.313519	0.31	219.238	173.41	19	Female	168	60	Somewhat good mood	Somewhat good mood	13	13	17	11	9	5	7	10	22	10	16	16	Somewhat Disagree	Strongly Agree	Disagree	Strongly Agree	Somewhat Disagree	Strongly Agree	Strongly Disagree	Strongly Agree	SouthEastEuro	Student	Certificate I-IV (eg, TAFE or equivalent)	$10,000 or less	1	Never smoked	0 standard drinks per week
788	940	NilRec	0.290403	0.29	380.72	804.047	24	Female	160.5	51	Very good mood	Very good mood	13	13	7	16	7	1	5	9	23	9	4	28	Disagree	Strongly Agree	Strongly Disagree	Strongly Agree	Neither Agree nor Disagree	Strongly Agree	Strongly Disagree	Strongly Agree	SouthEastEuro	Student	Adv. diploma or Assoc degree	$100,001 - $130,000	0	Never smoked	0 standard drinks per week
792	1540	NilRec	0.332095	0.31	45.9674	40.5365	18	Male	171	55	Very good mood	Somewhat good mood	14	11	17	11	11	9	21	17	18	14	16	16	Somewhat Disagree	Somewhat Agree	Disagree	Agree	Neither Agree nor Disagree	Somewhat Agree	Strongly Disagree	Strongly Agree	NorthAfricanMidEastern	Student	High school	More than $130,000	1	Never smoked	0 standard drinks per week
793	815	FacialRec	0.304797	0.29	602.745	477.579	18	Female	155	51	Very good mood	Neutral	20	28	16	25	6	27	6	22	29	3	17	15	Neither Agree nor Disagree	Neither Agree nor Disagree	Neither Agree nor Disagree	Neither Agree nor Disagree	Agree	Agree	Neither Agree nor Disagree	Neither Agree nor Disagree	NorthEastAsian	Student	High school	$50,001 - $60,000	0	Never smoked	0 standard drinks per week
794	1000	NilRec	0.323265	0.33	40.7881	87.8263	24	Male	188	94.5	Somewhat good mood	Neutral	13	13	13	13	13	13	13	13	16	16	16	16	Neither Agree nor Disagree	Somewhat Agree	Neither Agree nor Disagree	Neither Agree nor Disagree	Neither Agree nor Disagree	Neither Agree nor Disagree	Neither Agree nor Disagree	Neither Agree nor Disagree	Euro&MidEastern	Student	Undergrad uni degree (eg, BA, BPsych, BSci)	$30,001 $40,000	0	Never smoked	0 standard drinks per week
795	1120	CareRec	0.253237	0.15	224.477	268.848	30	Female	169	85.5	Very good mood	Very good mood	13	13	13	13	14	15	13	13	16	16	16	16	Agree	Strongly Agree	Disagree	Strongly Agree	Agree	Strongly Agree	Disagree	Strongly Agree	Euro&MidEast&Asian&Oceania	Student	Graduate diploma or certificate	More than $130,000		Never smoked	0 standard drinks per week
796	1250	FacialRec	0.269802		54.3472	39.0785	37	Female	166.5	59.5	Very good mood	Somewhat good mood	14	11	13	13	7	1	25	19	28	4	16	16	Neither Agree nor Disagree	Agree	Disagree	Agree	Agree	Agree	Disagree	Agree	SouthEastEuro	Student	Adv. diploma or Assoc degree	$30,001 $40,000	1	Current smoker (Please specify how many cigarettes you smoke a day)	0 standard drinks per week
